# Supplementary material
Source: PubMed Central journal article supplement (PMC6582262)
Supplement: jama-322-145-s001.pdf [file jama-322-145-s001.pdf]

## Supplementary Online Content

Corsi DJ, Walsh L, Weiss D, Hsu H, El-Chaar D, Hawken S, Fell DB, Walker M. Association between self-reported prenatal cannabis use and maternal, perinatal, and neonatal outcomes. *JAMA*. doi:10.1001/jama.8734

**eFigure.** Flow Diagram Describing Derivation of the Study Population and Analytical Cohorts, BORN Ontario 2012-2017

**eTable 1.** Comparison Between Excluded Participants and the Study Population Across Selected Covariates, BORN Ontario 2012-2017

**eTable 2.** Subgroup Analysis of the Effect of Cannabis Exposure on Preterm Birth Less Than 37 Weeks' Gestation Stratified by Tobacco Use, Alcohol Use, and Opioid Use in the Matched Cohort, BORN Ontario 2012-2017

This supplementary material has been provided by the authors to give readers additional information about their work.

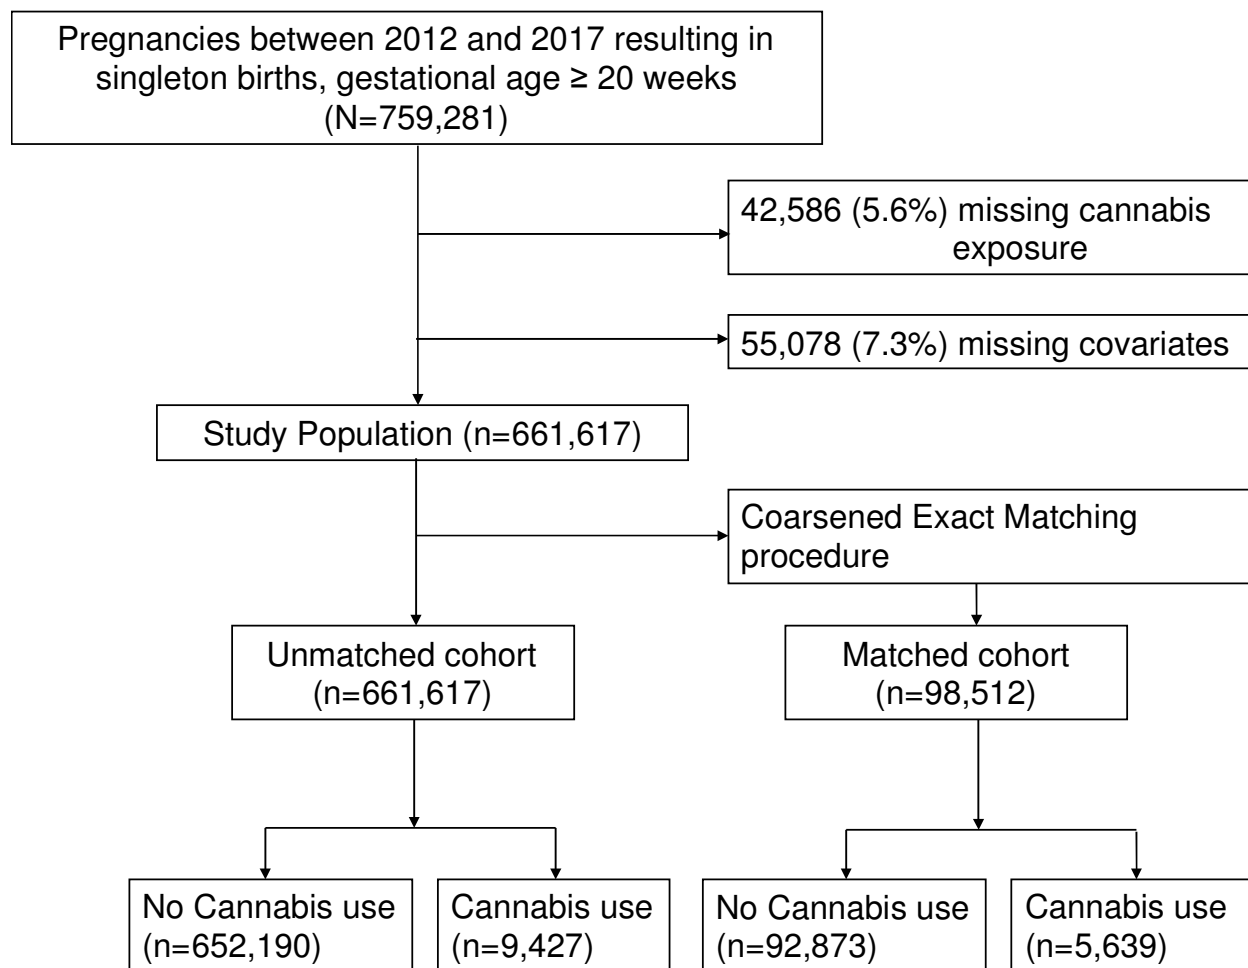

**eFigure.** Flow Diagram Describing Derivation of the Study Population and Analytical Cohorts, BORN Ontario 2012-2017

**eTable 1.** Comparison Between Excluded Participants and the Study Population Across Selected Covariates, BORN Ontario 2012-2017

|                                        | Excluded (N=97,664) |        | Study population (N=661,617) |        | SMD   |
|----------------------------------------|---------------------|--------|------------------------------|--------|-------|
|                                        | n                   | %      | n                            | %      |       |
| Age, years                             |                     |        |                              |        | 0.201 |
| 15-19                                  | 3,466               | (3.5)  | 25,056                       | (3.8)  |       |
| 20-24                                  | 10,250              | (10.5) | 91,955                       | (13.9) |       |
| 25-29                                  | 25,793              | (26.4) | 209,708                      | (31.7) |       |
| 30-34                                  | 35,930              | (36.8) | 224,255                      | (33.9) |       |
| 35+                                    | 22,225              | (22.8) | 110,643                      | (16.7) |       |
| Parity (not including index pregnancy) |                     |        |                              |        | 0.046 |
| 0                                      | 39,917              | (45.2) | 284,906                      | (43.1) |       |
| 1                                      | 30,395              | (34.4) | 231,976                      | (35.1) |       |
| 2                                      | 11,816              | (13.4) | 94,796                       | (14.3) |       |
| 2+                                     | 6,227               | (7.0)  | 49,939                       | (7.5)  |       |
| Area level income quintile             |                     |        |                              |        | 0.202 |
| 1                                      | 11,247              | (12.4) | 102,496                      | (15.5) |       |
| 2                                      | 11,182              | (12.4) | 103,954                      | (15.7) |       |
| 3                                      | 16,977              | (18.8) | 137,536                      | (20.8) |       |
| 4                                      | 21,475              | (23.7) | 155,815                      | (23.6) |       |
| 5                                      | 29,572              | (32.7) | 161,816                      | (24.5) |       |
| Tobacco Smoking                        | 5,891               | (9.5)  | 53,814                       | (8.1)  | 0.048 |
| Alcohol use                            | 1,247               | (2.4)  | 14,972                       | (2.3)  | 0.007 |
| Other drug use                         | 535                 | (1.0)  | 2,280                        | (0.3)  | 0.078 |
| Mental health conditions <sup>a</sup>  | 8,782               | (16.2) | 103,127                      | (15.6) | 0.017 |
| Antenatal care provider                |                     |        |                              |        | 0.492 |
| Family physician                       | 11,735              | (16.6) | 169,892                      | (25.7) |       |
| Obstetrician                           | 52,050              | (73.8) | 382,468                      | (57.8) |       |
| Midwife                                | 2,851               | (4.0)  | 95,874                       | (14.5) |       |
| Other/none                             | 3,937               | (5.6)  | 13,383                       | (2.0)  |       |
| Year of birth                          |                     |        |                              |        | 0.293 |
| 2012                                   | 22,187              | (22.7) | 110,762                      | (16.7) |       |
| 2013                                   | 19,489              | (20.0) | 111,961                      | (16.9) |       |
| 2014                                   | 21,230              | (21.7) | 110,170                      | (16.7) |       |
| 2015                                   | 13,215              | (13.5) | 118,364                      | (17.9) |       |
| 2016                                   | 12,382              | (12.7) | 119,583                      | (18.1) |       |
| 2017                                   | 9,161               | (9.4)  | 90,777                       | (13.7) |       |

<sup>a</sup>Includes addiction, anxiety, bipolar disorder, depression, postpartum depression, or schizophrenia diagnosed or self-reported in current pregnancy.

**eTable 2.** Subgroup Analysis of the Effect of Cannabis Exposure on Preterm Birth Less Than 37 Weeks' Gestation Stratified by Tobacco Use, Alcohol Use, and Opioid Use in the Matched Cohort, BORN Ontario 2012-2017

| Subgroup       | Risk Difference<br>(95% CI) |                  | P-interaction | Relative Risk<br>(95% CI) |               | P-interaction |
|----------------|-----------------------------|------------------|---------------|---------------------------|---------------|---------------|
|                |                             |                  |               |                           |               |               |
| Cannabis only  | 2.20                        | (1.73 - 2.67)    | -             | 1.34                      | (1.27 - 1.42) | -             |
| Tobacco use    | 3.73                        | (1.41 - 6.05)    | <0.001        | 1.46                      | (1.16 - 1.83) | 0.08          |
| No Tobacco use | 2.28                        | (1.84 - 2.73)    |               | 1.36                      | (1.29 - 1.44) |               |
| Alcohol use    | 3.28                        | (-3.09 - 9.64)   | 0.69          | 1.59                      | (0.64 - 3.95) | 0.25          |
| No Alcohol use | 2.96                        | (2.58 - 3.33)    |               | 1.41                      | (1.35 - 1.46) |               |
| Opioid use     | 4.73                        | (-11.73 - 21.20) | 0.24          | 1.37                      | (0.45 - 4.19) | 0.99          |
| No Opioid use  | 2.93                        | (2.57 - 3.30)    |               | 1.41                      | (1.36 - 1.47) |               |
